# Supplementary material
Source: bioRxiv or medRxiv preprint supplement (https://medrxiv.org/highwire/filestream/91855/field_highwire_adjunct_files/0/2020.07.30.20149567-1.pdf)
Supplement: Supplementary file [file 2020.07.30.20149567-1.pdf]

## **Summary boxes**

### **What is already known on this topic:**

Use of serological tests for epidemiological studies has been considered useful, but their role to assess individual immunity is controversial

A Cochrane systematic review concluded higher quality clinical studies assessing the diagnostic accuracy of serological tests for COVID-19 are urgently needed.

Surveillance of Health Care Workers (HCW), exposed to COVID-19, has been promoted by the national and regional government using serological tests.

### **What this study adds:**

Sensitivity and specificity of two serological tests, measured on hospitalized patients after 14 days since first symptoms and in historical, pre-covid19, controls showed performance adequate according with the MHRA standard criteria.

IgG antibodies were measured in a large group of HCW in an area at medium level of COVID-19 epidemics Italy. The estimated prevalence of a previous infection was lower than 5%.

PCR- test of swab in serological test IgG positive individuals was rarely positive.

Serological testing can be considered in a long term, integrated surveillance policy of higher risk population, but is not a substitute for a contact tracing policy.
